# Supplementary material for: Characteristics of US hospitals using extraordinary collections actions against patients for unpaid medical bills: a cross-sectional study
Source: HighWire-hosted journal article supplement (doi:10.1136/bmjopen-2021-060501), 2022-07-01
Supplement: bmjopen-2021-060501supp001_data_supplement.pdf [file bmjopen-2021-060501supp001_data_supplement.pdf]

**APPENDIX**

Table 1. Odds ratios for hospitals suing patients.

|                                    | OR   | (95% C.I.)    | P    | aOR  | (95% C.I.)    | P    |
|------------------------------------|------|---------------|------|------|---------------|------|
| Type of hospital                   |      |               |      |      |               |      |
| Government                         | Ref  |               |      | Ref  |               |      |
| For-profit                         | 0.17 | (0.02, 1.57)  | 0.12 | 0.34 | (0.02, 7.49)  | 0.49 |
| Non-profit                         | 0.66 | (0.24, 1.84)  | 0.43 | 0.79 | (0.24, 2.58)  | 0.69 |
| Average Markup                     | 0.88 | (0.72, 1.09)  | 0.24 | 0.18 | (0.74, 1.47)  | 0.80 |
| Gross Revenue                      | 1.00 | (1.00, 1.00)  | 0.71 | 1.00 | (1.00, 1.00)  | 0.28 |
| Bed number                         | 1.00 | (1.00, 1.00)  | 0.25 | 1.00 | (1.00, 1.00)  | 0.19 |
| Lown Institute Charity Care rating | 0.56 | (0.38, 0.84)  | 0.01 | 0.51 | (0.30, 0.85)  | 0.01 |
| Leapfrog hospital safety grade     |      |               |      |      |               |      |
| A                                  | Ref  |               |      | Ref  |               |      |
| B                                  | 0.88 | (0.26, 2.97)  | 0.84 | 1.24 | (0.31, 4.97)  | 0.77 |
| C                                  | 1.10 | (0.36, 3.33)  | 0.87 | 0.98 | (0.29, 3.33)  | 0.98 |
| D                                  | 4.23 | (0.62, 28.74) | 0.14 | 2.84 | (0.32, 25.46) | 0.25 |

Table 2. The top five hospitals that improved most based on their predatory debt collection grade.

Source: State and County Public Court Records

| Hospital | Improvements                                                                                                               |
|----------|----------------------------------------------------------------------------------------------------------------------------|
| A        | This hospital had 6,391 lawsuits and 3,085 wage garnishments in 2018. They had 0 lawsuits and 0 wage garnishments in 2020. |
| B        | 478 lawsuits in 2018 and 0 lawsuits in 2020.                                                                               |

|   |                                                                                                        |
|---|--------------------------------------------------------------------------------------------------------|
| C | Sued for \$10.9 million in 2018 and \$1.9 million in 2020.                                             |
| D | 405 lawsuits and 529 wage garnishments in 2018. They had 26 lawsuits and 21 wage garnishments in 2020. |
| E | Sued for \$422,859 in 2018 and \$28,582 in 2020.                                                       |

10

11

12

13

14

15
